# Supplementary material
Source: Springer Nature journal article supplement (https://www.springermedizin.de/resource/supplementary/12885_2012_3945_MOESM3_ESM.pdf/9464716)

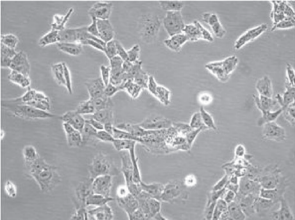

**neo**

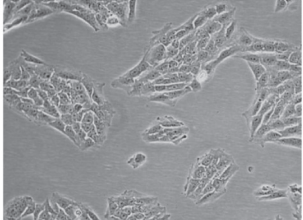

**WT**

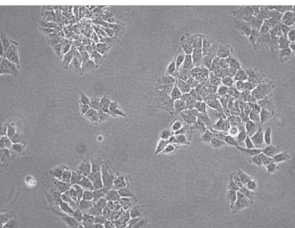

**gsv1,4,5**

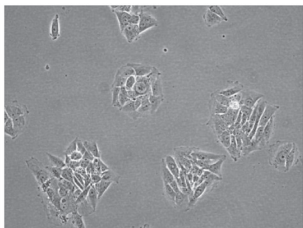

**gsv1,2,5**

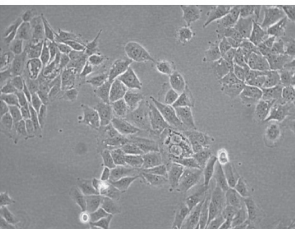

**gsv4,5**

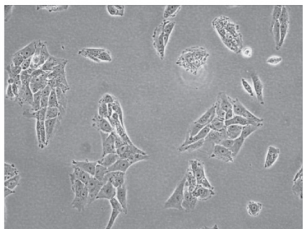

**gsv1-6**

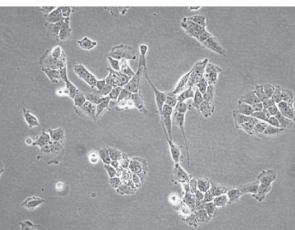

**untransfected**

Supplement: MOESM3 [file 9464716]
